# Supplementary material for: Dependence on the structure and surface polarity of ZnS photocatalytic activities of water splitting: first-principles calculations
Source: Royal Society of Chemistry journal article supplement (doi:10.1039/c3cp50330e), 2013-01-01
Supplement: c3cp50330e.pdf [file c3cp50330e.pdf]

## Supplementary Information

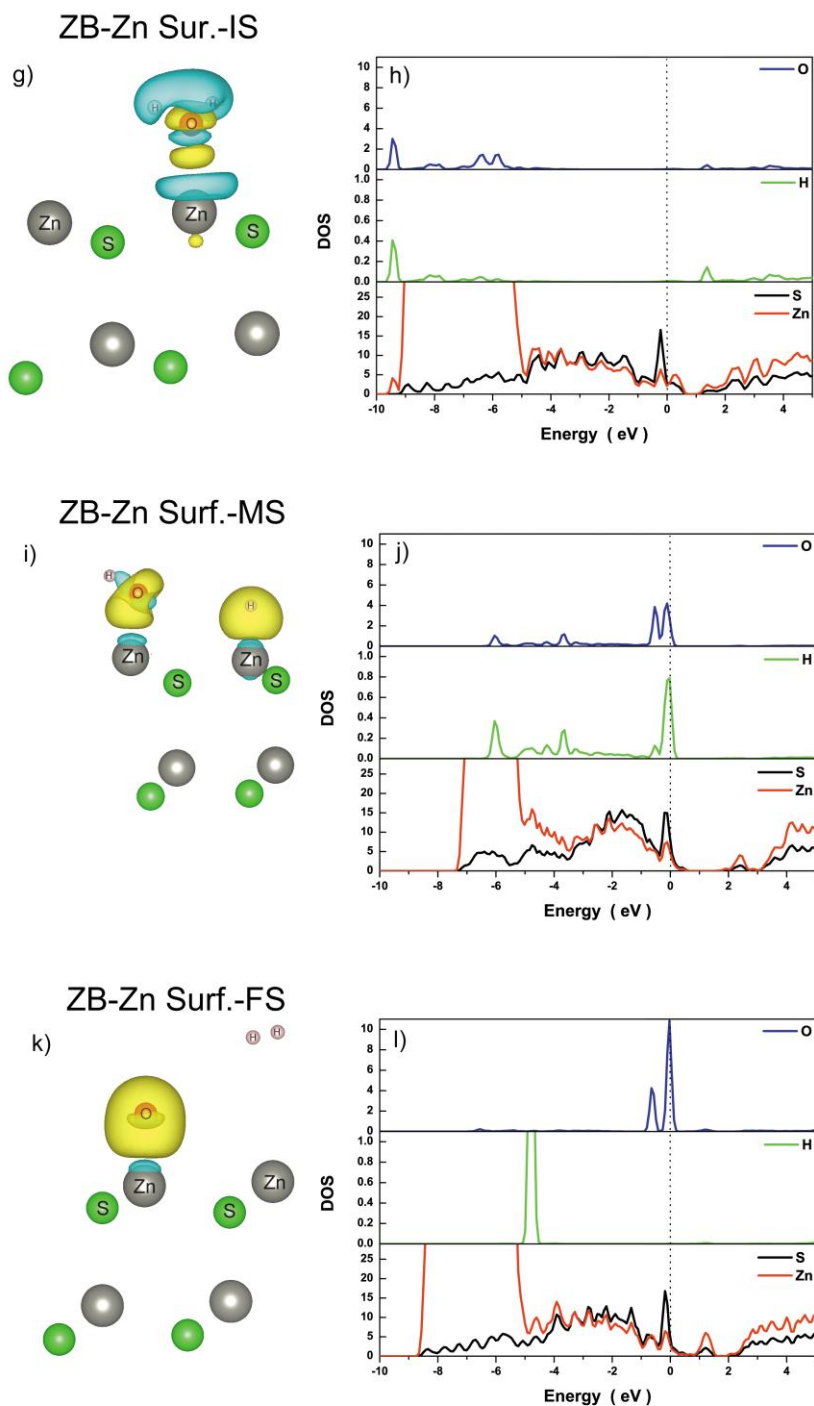

Figure 1S. Calculated DOSs and bonding charge density of states along the MEP path on the ZB (111) surface. *g*) and *h*) for IS, *i*) and *j*) for MS, and *k*) and *l*) for FS. Energies are referred to the Fermi level, which is marked by a vertical dash line.

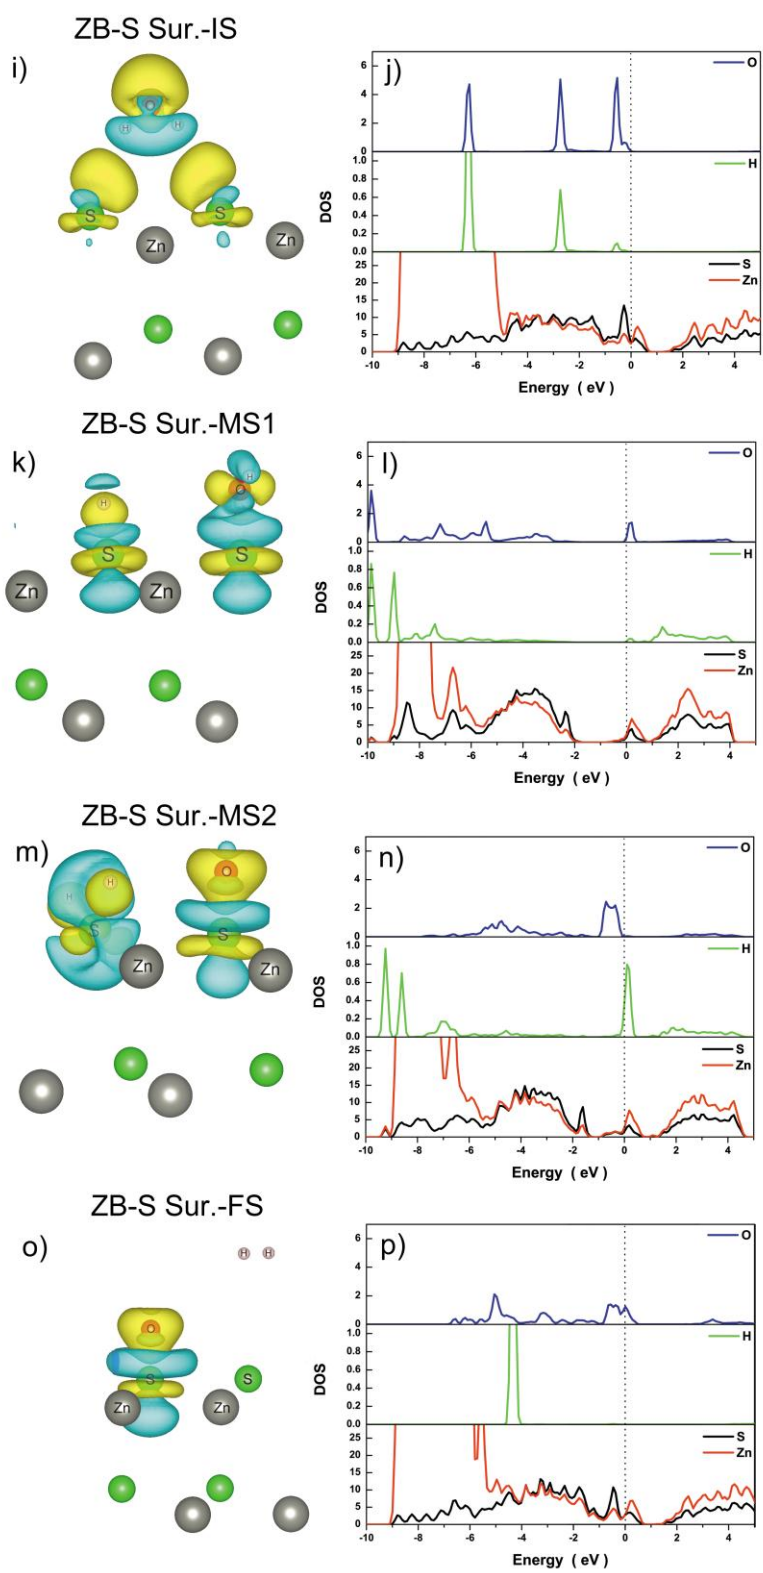

Figure 2S. Calculated DOSs and bonding charge density of states along the MEP path on the ZB (111) surface. *i*) and *j*) for IS, *k*) and *l*) for MS1, (*m*) and (*n*) for MS2, and *o*) and *p*) for FS. Energies are referred to the Fermi level, which is marked by a vertical dash line.

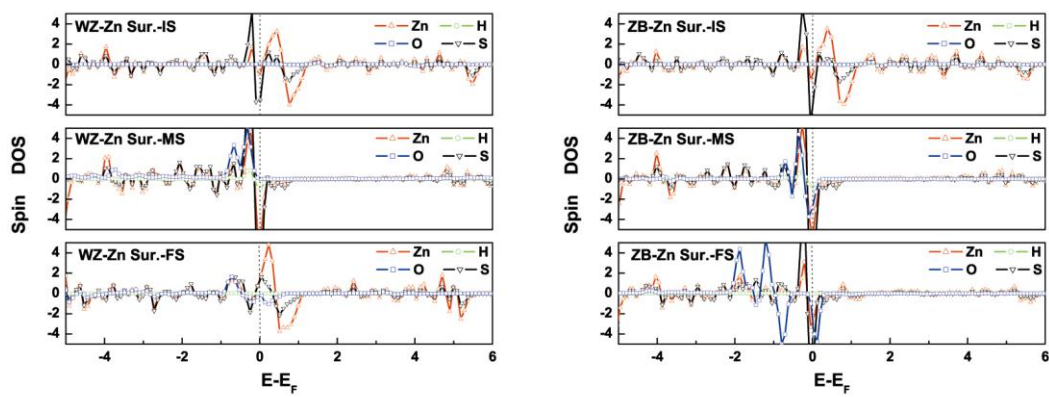

**Figure 3S.** Calculated Spin DOSs ( Spin up minus Spin down) of states along the MEP path on the WZ (0001) and ZB (111) surfaces. Energies are referred to the Fermi level, which is marked by a vertical dash line.

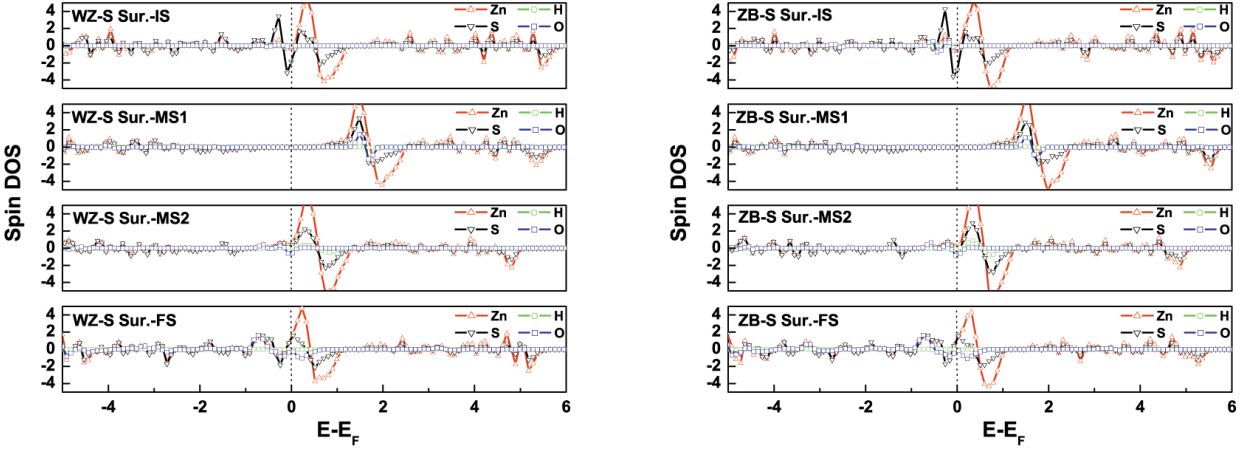

Figure 4S. Calculated Spin DOSs ( Spin up minus Spin down) of states along the MEP path on the WZ (0001) and ZB (111) surfaces. Energies are referred to the Fermi level, which is marked by a vertical dash line.
